# Supplementary material for: Assessing Coral Reefs on a Pacific-Wide Scale Using the Microbialization Score
Source: PLoS One. 2012 Sep 7;7(9):e43233. doi: 10.1371/journal.pone.0043233 (PMC3436891; doi:10.1371/journal.pone.0043233)
Supplement: Table S3 — Summary table for Figure S1. The importance of each component and the contribution (loadings) of each variable is shown. MS = microbialization score; CCA = % crustose coralline algae cover; DZ = % coral disease prevalence; CO = % coral cover; CH = % coral with other indications of compromised health. (XLS) [file pone.0043233.s005.xls]

## Sheet: Table S3
	Importance of Components
	Comp.1	Comp.2	Comp.3	Comp.4	Comp.5
Standard deviation	1.50986	1.00261	0.903437	0.723644	0.612582
Proportion of Variance	0.455933	0.201044	0.16324	0.104732	0.0750513
Cumulative Proportion	0.455933	0.656977	0.820217	0.924949	1
	PCA Loadings
DZ	0.493	-0.454	0.149	0.394	0.611
CH	0.464	-0.402	-0.504		-0.602
CCA	-0.392	-0.525	0.578	0.283	-0.397
CO	-0.403	-0.593	-0.348	-0.521	0.305
MS	0.475		0.519	-0.697	-0.114
